# Supplementary material for: Head-to-Head Study of Developmental Neurotoxicity and Resultant Phenotype in Rats: α-Hexabromocyclododecane versus Valproic Acid, a Recognized Model of Reference for Autism Spectrum Disorders
Source: MDPI journal article supplement (doi:10.3390/toxics10040180), 2022-04-06
Supplement: s1 [file s1]

# Supplementary Materials: Head-to-Head Study of Developmental Neurotoxicity and Resultant Phenotype in Rats: $\alpha$ -Hexabromocyclododecane *versus* Valproic Acid, a Recognized Model of Reference for Autism Spectrum Disorders

Chloé Morel, Armelle Christophe, Katy Maguin Gaté, Justine Paoli, Jonathan D. Turner, Henri Schroeder and Nathalie Grova

**Table S1.** Effects of maternal exposure to  $\alpha$ -HBCDD (100ng/kg/day) or VPA (600mg/kg) in the water escape pole climbing (WESPOC) test at PND20. Results expressed by mean  $\pm$  S.E.M. PND = post-natal day.

|                                                             | Control          | $\alpha$ -HBCDD<br>(100 ng/kg/day) | VPA<br>(600 mg/kg) | F (2,58) | p     |
|-------------------------------------------------------------|------------------|------------------------------------|--------------------|----------|-------|
| Time to perform the test (s)                                | 28.5 $\pm$ 4.5   | 40.12 $\pm$ 10.5                   | 25.9 $\pm$ 3.2     | 0.532    | 0.766 |
| Successful pups (%)                                         | 100              | 96                                 | 100                |          |       |
| <b>Time to perform the different phases of the test (s)</b> |                  |                                    |                    |          |       |
| Swimming into the pool                                      | 9.7 $\pm$ 1.1    | 13.5 $\pm$ 5.3                     | 8.3 $\pm$ 1.3      | 0.481    | 0.621 |
| Climbing the metal rod                                      | 22.9 $\pm$ 5.1   | 25.8 $\pm$ 8.2                     | 17.6 $\pm$ 2.5     | 0.38     | 0.685 |
| Landing the platform                                        | 198.1 $\pm$ 12.4 | 192.8 $\pm$ 12.4                   | 213.1 $\pm$ 3.3    | 1.908    | 0.157 |
